# Supplementary material
Source: HighWire-hosted journal article supplement (doi:10.1101/rna.079210.122)
Supplement: Supplemental_Legend.docx [file Supplemental_Legend.docx]

Suppl. Figure 1 Percentage Identity matrix. Amino acid sequences of all individual glycolytic enzymes from *Arabidopsis thaliana*, *Saccharomyces cerevisiae* and *Homo sapiens* with all their isoforms were compared by multiple alignment with UniProt using clustalo version 1.2.4 with default settings. Table show similarity in percentage for all pairwise comparisons obtained by UniProt website.
